# Supplementary material for: Prevalence of Metabolic Syndrome in Patients with Type 2 Diabetes in Japan: A Retrospective Cross-Sectional Study
Source: Springer Nature journal article supplement (doi:10.1007/s13300-023-01484-4), 2023-10-19
Supplement: MOESM1 [file 26200754]

**Supplementary information for:**

Prevalence of metabolic syndrome in patients with type 2 diabetes in Japan: a retrospective cross-sectional study

Yasushi Ishigaki<sup>1</sup>, Tetsuaki Hirase<sup>2</sup>, Swathi Pathadka<sup>3</sup>, Zhihong Cai<sup>2</sup>, Manaka Sato<sup>2</sup>, Ryo Takemura<sup>4</sup>, Noriyuki Ishida<sup>4</sup>

<sup>1</sup>Division of Diabetes, Metabolism, and Endocrinology, Department of Internal Medicine, Iwate Medical University, Yahaba, Japan

<sup>2</sup>Japan Drug Development and Medical Affairs, Eli Lilly Japan K.K., Hyogo, Japan

<sup>3</sup>Lilly Capability Center India, Eli Lilly Services Private Ltd, Bengaluru, India

<sup>4</sup>Biostatistics Unit, Clinical and Translational Research Center, Keio University Hospital, Tokyo, Japan

**Corresponding author:** Swathi Pathadka

Email: pathadka\_swathi@lilly.com

**Table S1. Variables and definitions**

| Variable                    | Definition                                                                                                                                                                                                                                                                                                                                                                         |
|-----------------------------|------------------------------------------------------------------------------------------------------------------------------------------------------------------------------------------------------------------------------------------------------------------------------------------------------------------------------------------------------------------------------------|
| Demographics                | Age (on the date of health check-up) and sex                                                                                                                                                                                                                                                                                                                                       |
| Body mass index             | Body mass index (kg/m <sup>2</sup> )                                                                                                                                                                                                                                                                                                                                               |
| Central obesity indicator   | Waist circumference (cm)                                                                                                                                                                                                                                                                                                                                                           |
| Vitals and laboratory tests | Systolic blood pressure, diastolic blood pressure (mmHg)<br>Lipid profile: triglyceride, high-density lipoprotein, low-density lipoprotein (mg/dL)<br>Fasting blood sugar (mg/dL)<br>HbA1c % (NGSP)                                                                                                                                                                                |
| Comorbidities               | Presence of confirmed diagnosis codes below during the health check-up year (January-December):<br>Congestive heart failure (ICD-10: I50)<br>Stroke (ischemic and hemorrhagic) (ICD-10: I60-63)<br>Chronic kidney disease (ICD-10: N18 and/or GFR <60 ml/min/1.73 m <sup>2</sup> )<br>Myocardial infarction (ICD-10: I21, I22)<br>Atrial fibrillation (ICD-10: I48.0-I48.2, I48.9) |
| Cardiovascular medications  | Use of the drugs below during the health check-up year (January-December):<br>Lipid-lowering drugs (ATC code: C10)<br>Antihypertensive drugs (ATC code: C02-04, C07, C08)<br>Aspirin (ATC code: B01AC06)                                                                                                                                                                           |

ATC, Anatomical Therapeutic Chemical; GFR, glomerular filtration rate; HbA1c, glycated hemoglobin; ICD-10, International Classification of Diseases-10<sup>th</sup> revision; JMDC, Japanese Medical Database Company; NGSP, National Glycohemoglobin Standardization Program.

**Table S2. Demographics of the study cohort by year**

|                                          | <b>No MetS</b> | <b>MetS</b>   |
|------------------------------------------|----------------|---------------|
| <b>Study cohort, N</b>                   |                |               |
| 2018                                     | 80,890         | 58,125        |
| 2019                                     | 90,302         | 64,237        |
| 2020                                     | 88,806         | 66,847        |
| <b>Sex, no. (%)</b>                      |                |               |
| <b>2018</b>                              |                |               |
| Men                                      | 63,075 (78.0)  | 52,058 (89.6) |
| Women                                    | 17,815 (22.0)  | 6,067 (10.4)  |
| <b>2019</b>                              |                |               |
| Men                                      | 69,358 (76.8)  | 57,088 (88.9) |
| Women                                    | 20,944 (23.2)  | 7,149 (11.1)  |
| <b>2020</b>                              |                |               |
| Men                                      | 67,868 (76.4)  | 59,124 (88.4) |
| Women                                    | 20,938 (23.6)  | 7,723 (11.6)  |
| <b>Age, years</b>                        |                |               |
| 2018                                     | 55.2 (8.4)     | 53.6 (8.1)    |
| 2019                                     | 55.3 (8.6)     | 53.8 (8.2)    |
| 2020                                     | 55.2 (8.7)     | 53.8 (8.3)    |
| <b>Body mass index, kg/m<sup>2</sup></b> |                |               |
| 2018                                     | 25.1 (4.4)     | 29.0 (4.4)    |
| 2019                                     | 25.2 (4.4)     | 29.0 (4.4)    |
| 2020                                     | 25.2 (4.5)     | 29.1 (4.5)    |
| <b>Waist circumference, cm</b>           |                |               |
| 2018                                     | 87.5 (11.0)    | 97.9 (9.8)    |
| 2019                                     | 87.7 (11.1)    | 98.1 (9.9)    |
| 2020                                     | 87.9 (11.2)    | 98.3 (10.0)   |
| <b>Systolic blood pressure, mmHg</b>     |                |               |

|                                       |              |               |
|---------------------------------------|--------------|---------------|
| 2018                                  | 124.1 (15.2) | 135.5 (15.1)  |
| 2019                                  | 123.8 (15.2) | 135.5 (15.3)  |
| 2020                                  | 124.4 (15.3) | 135.9 (15.2)  |
| <b>Diastolic blood pressure, mmHg</b> |              |               |
| 2018                                  | 76.0 (10.1)  | 84.2 (10.3)   |
| 2019                                  | 75.9 (10.0)  | 84.3 (10.4)   |
| 2020                                  | 76.3 (10.0)  | 84.4 (10.3)   |
| <b>Triglycerides, mg/dL</b>           |              |               |
| 2018                                  | 118.9 (89.3) | 199.3 (149.6) |
| 2019                                  | 117.6 (88.1) | 197.9 (150.3) |
| 2020                                  | 117.8 (86.8) | 197.9 (148.4) |
| <b>HDL-C, mg/dL</b>                   |              |               |
| 2018                                  | 58.3 (15.5)  | 49.7 (12.2)   |
| 2019                                  | 58.9 (15.6)  | 50.2 (12.3)   |
| 2020                                  | 59.1 (15.7)  | 50.4 (12.4)   |
| <b>LDL-C, mg/dL</b>                   |              |               |
| 2018                                  | 114.7 (30.1) | 120.3 (31.5)  |
| 2019                                  | 114.2 (30.0) | 120.4 (31.8)  |
| 2020                                  | 113.5 (30.2) | 120.1 (31.9)  |
| <b>Fasting blood glucose, mg/dL</b>   |              |               |
| 2018                                  | 130.8 (37.7) | 148.3 (40.1)  |
| 2019                                  | 130.8 (37.6) | 148.6 (40.4)  |
| 2020                                  | 130.7 (37.9) | 150.0 (41.8)  |
| <b>HbA1c (%)</b>                      |              |               |
| 2018                                  | 7.0 (1.2)    | 7.4 (1.3)     |
| 2019                                  | 7.0 (1.2)    | 7.4 (1.3)     |
| 2020                                  | 7.0 (1.2)    | 7.5 (1.4)     |

Mean (standard deviation) shown unless otherwise indicated.

HbA1c, glycated hemoglobin; HDL-C, high-density lipoprotein cholesterol; LDL-C, low-density lipoprotein cholesterol; MetS, patients with metabolic syndrome; No MetS, patients without metabolic syndrome.

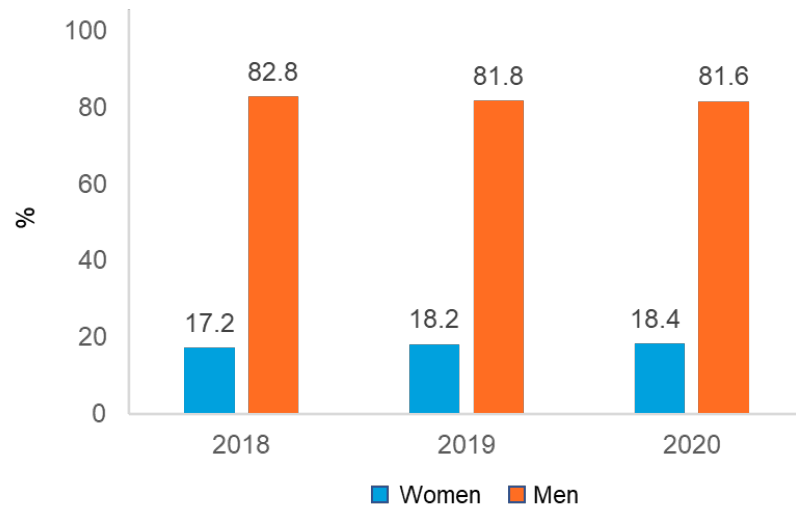

**Figure S1. Sex distribution of study cohorts (2018-2020).**

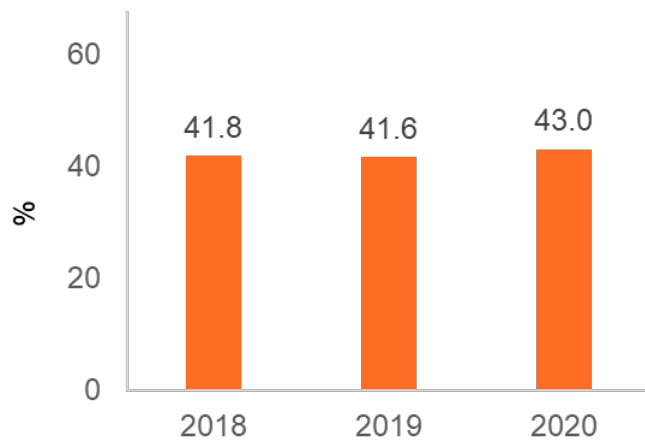

**Figure S2. Prevalence of metabolic syndrome in patients with T2D (2018-2020).**

T2D, type 2 diabetes.

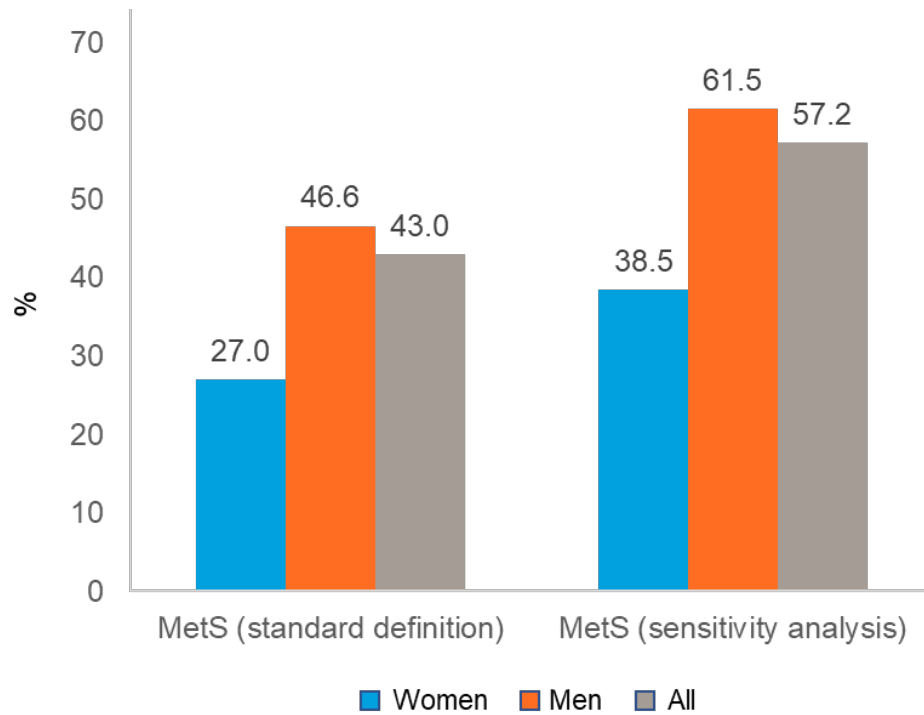

**Figure S3. Prevalence of metabolic syndrome in patients with T2D using a modified definition in the 2020 study cohort.**

Prevalence of metabolic syndrome as defined by the criteria used for the main analysis (standard definition based on the Japanese Committee for the Diagnostic Criteria of Metabolic Syndrome [2005] [21, 22]) and the sensitivity analysis (standard definition and/or a prescription of antihypertensive agent or lipid-lowering drug).

MetS, patients with metabolic syndrome; T2D, type 2 diabetes.
